# Supplementary material
Source: MDPI journal article supplement (https://www.mdpi.com/2076-3417/8/8/1402)
Supplement: s1 [file s1]

# Supplementary Information

## Conformal Titanyl Phosphate Surface Passivation for Enhancing Photocatalytic Activity

Jung Kyu Kim<sup>1\*</sup>

<sup>1</sup> School of Chemical Engineering, Sungkyunkwan University (SKKU), Suwon 16419, Republic of Korea;  
legkim@skku.edu

\* Correspondence: [legkim@skku.edu](mailto:legkim@skku.edu)

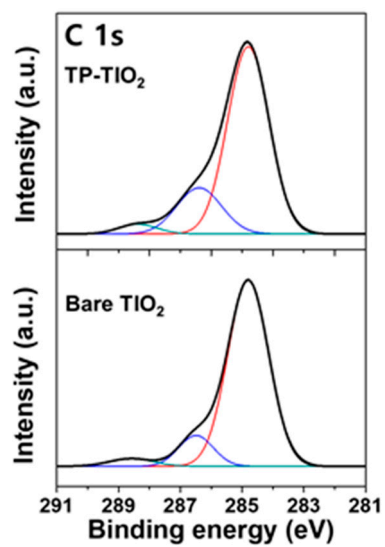

Figure S1. C 1s XPS spectra of bare and TP-TiO<sub>2</sub>.

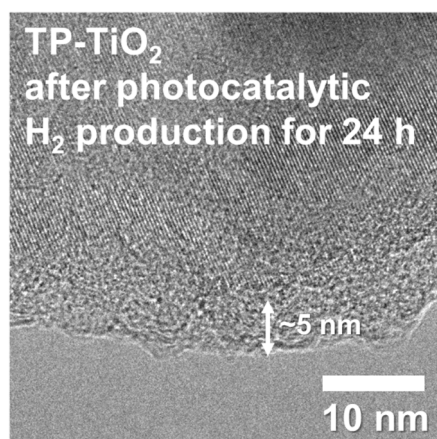

Figure S2. TEM image of TP-TiO<sub>2</sub> after carrying out the photocatalytic H<sub>2</sub> production experiment for 24 hours.

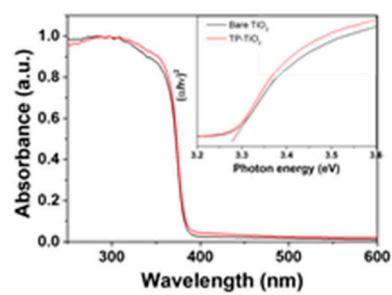

Figure S3. UV-Vis absorbance spectra and Tauc plot (insert) of bare and TP-TiO<sub>2</sub>.

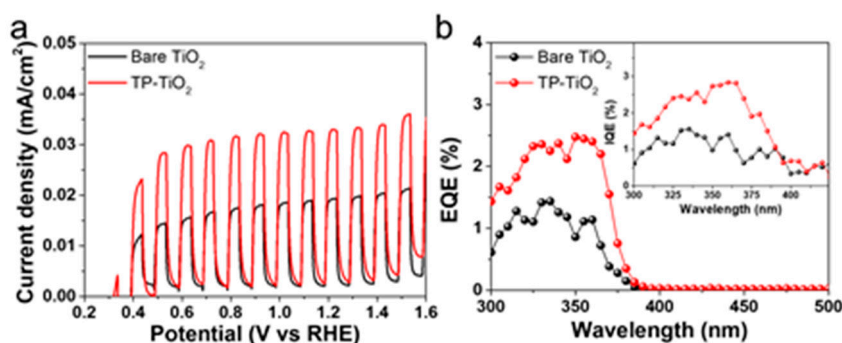

Figure S4. (a) Current density to potential ( $J$ - $V$ ) curves of bare and TP-TiO<sub>2</sub> under on/off chopped 1 sun irradiation and (b) external quantum efficiency (EQE) spectra. The insert graph shows internal quantum efficiency (IQE = EQE/Absorptance) spectra. Here, a Polarnoix K3100 IPCE Measurement System (McScience Inc.) with a 300 W Xe lamp as a monochromator was exploited.

The wavelength-dependent external quantum efficiency (EQE = Absorptance ( $\lambda$ )  $\times$  Charge separation efficiency  $\times$  Charge transfer efficiency) was characterized to investigate the solar conversion efficiency. TP-TiO<sub>2</sub> exhibited higher quantum efficiency values than bare TiO<sub>2</sub> at the range of wavelength from 300 nm to 385 nm. To gain more insights into the EQE, the internal quantum efficiency (IQE = EQE ( $\lambda$ )/Absorptance ( $\lambda$ )) spectra were characterized in the insert image of Figure S4b. The calculated IQE spectrum of TP-TiO<sub>2</sub> shows significantly higher efficiency compared to that of bare TiO<sub>2</sub>.
